# Supplementary figures and images for: Dynamic hydrological discharge modelling for coupled climatemodel simulations of the last glacial cycle
Source: Copernicus journal article supplement (doi:10.5194/gmd-2018-10), 2018-03-29

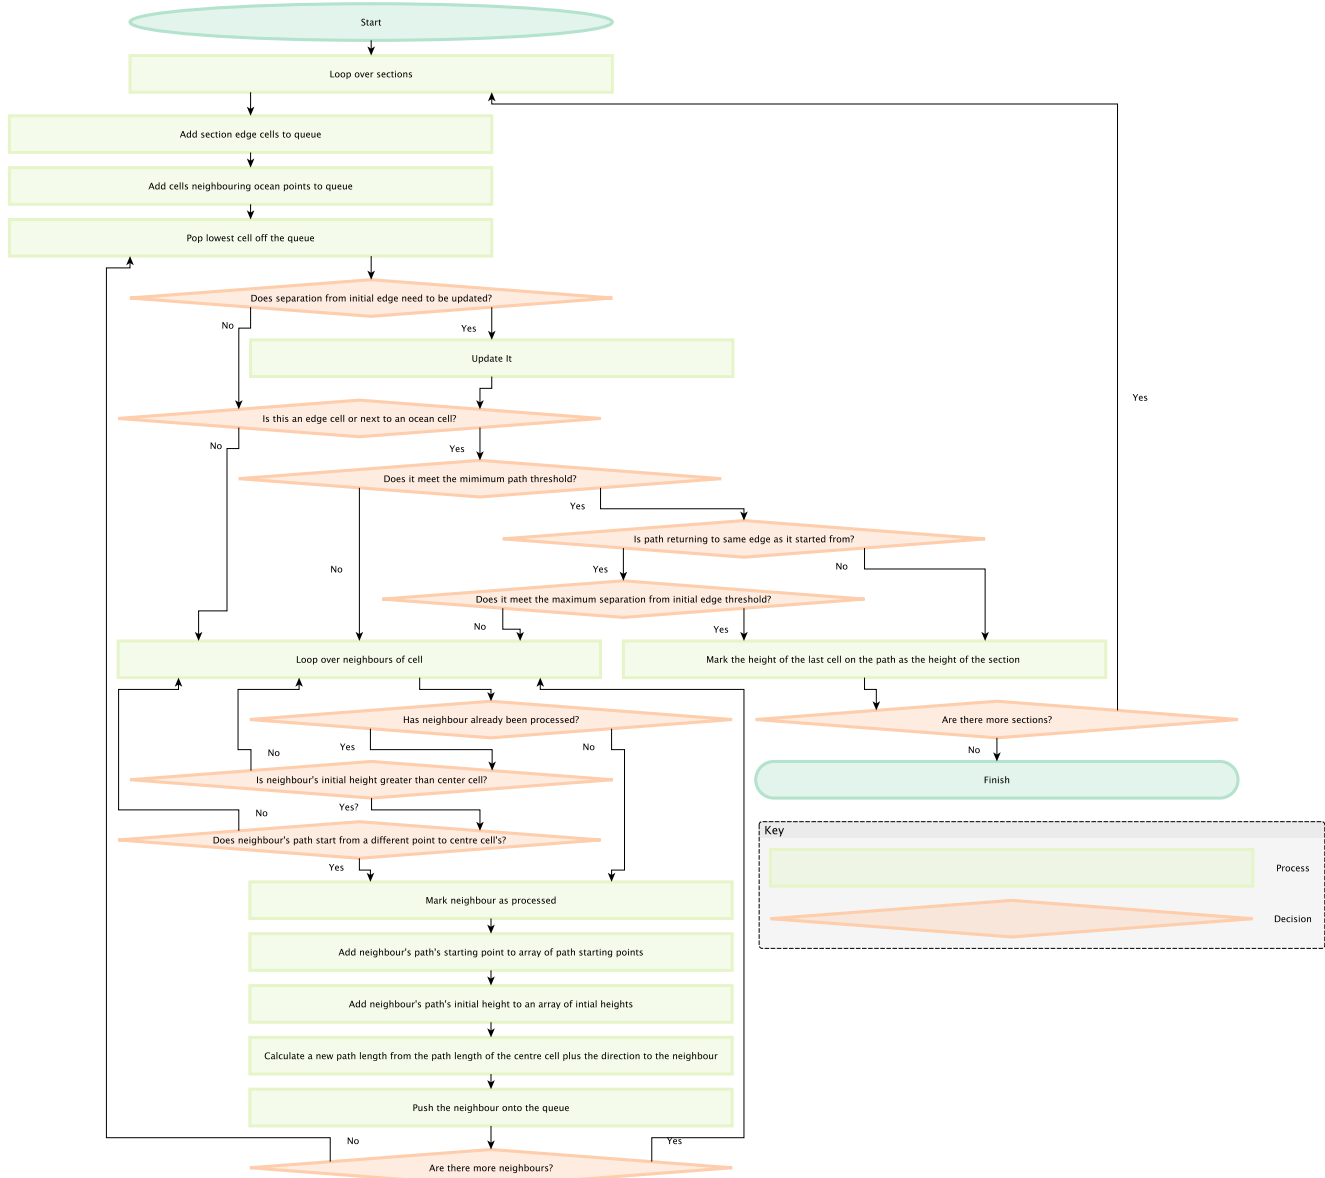

**Figure S1.** Flow diagram illustrating the steps of the orography upscaling algorithm.

Supplement: Supplementary file 1 [file gmd-2018-10-supplement.pdf]
